# Supplementary material for: Mapping EQ-5D-3L from the Knee Injury and Osteoarthritis Outcome Score (KOOS)
Source: Qual Life Res. 2019 Sep 20;29(1):265–74. doi: 10.1007/s11136-019-02303-9 (PMC6962127; doi:10.1007/s11136-019-02303-9)
Supplement: Supplementary file 6 — Supplementary material 6 (XLS 32 kb) [file 11136_2019_2303_MOESM6_ESM.xls]

## Sheet: Table of results
Table 6. Preferred linear model with KOOS included in form of individual KOOS subscales.
	b	se	t	pvalue	ll	ul
Pain/100	-1.62472	0.474174	-3.42643	0.000612696	-2.55414	-0.695308
Symptom/100	0.0653657	0.00839869	7.78284	7.40486e-15	0.0489037	0.0818277
ADL/100	0.425677	0.0860179	4.9487	7.52672e-07	0.257075	0.594278
QoL/100	-0.0528021	0.0227039	-2.32569	0.0200444	-0.0973033	-0.00830083
Sport/100	-0.353197	0.0476147	-7.41782	1.23403e-13	-0.446526	-0.259869
age	0.00119833	8.0852e-05	14.8213	1.8544e-49	0.00103986	0.00135681
0b.female	0
1.female	0.00201692	0.00163878	1.23074	0.218433	-0.00119521	0.00522904
Pain/100_squared	0.468863	0.132563	3.53692	0.000405666	0.209031	0.728696
Pain/100_square root	1.99178	0.476306	4.18172	2.90435e-05	1.05819	2.92537
ADL/100_squared	-0.151634	0.0537154	-2.82292	0.00476315	-0.25692	-0.0463482
QoL/100_square root	0.463738	0.0305105	15.1993	6.5904e-52	0.403935	0.523541
Sport/100_squared	0.190417	0.0221994	8.5776	1.03217e-17	0.146905	0.23393
Sport/100_square root	0.229865	0.0328969	6.98744	2.87987e-12	0.165385	0.294345
_cons	-0.693623	0.12911	-5.37233	7.85213e-08	-0.946689	-0.440558
Bayesian information criteria	-38300.8
Mean error	1.65e-17
Mean absolute error	0.1037
Root mean squared error	0.1505

## Sheet: Covariance matrix
	Pain/100	Symptom/100	ADL/100	QoL/100	Sport/100	age	0b.female	1.female	Pain/100_squared	Pain/100_square root	ADL/100_squared	QoL/100_square root	Sport/100_squared	Sport/100_square root	_cons
Pain/100	0.224841	-7.6232e-05	0.00295164	0.000260189	-0.00459886	4.68214e-07	0	1.0276e-07	-0.0615512	-0.223237	-0.0028167	4.31254e-05	0.0031767	0.00174045	0.059201
Symptom/100	-7.6232e-05	7.0538e-05	2.63638e-06	-7.05295e-06	1.29228e-05	-8.895e-08	0	-3.23329e-07	1.42685e-06	5.38116e-05	-7.41719e-06	4.02698e-06	-1.24097e-05	-8.62027e-06	-2.88689e-05
ADL/100	0.00295164	2.63638e-06	0.00739908	0.000164937	0.000692881	4.76856e-08	0	-9.40059e-07	0.000569316	-0.00672396	-0.00455225	-0.000270442	-0.000219017	-0.000507326	0.000505347
QoL/100	0.000260189	-7.05295e-06	0.000164937	0.000515466	3.71437e-05	-1.46476e-07	0	-4.27415e-07	-0.000192914	5.59463e-05	-9.41327e-05	-0.00067139	-7.7531e-05	4.16676e-05	-1.05728e-05
Sport/100	-0.00459886	1.29228e-05	0.000692881	3.71437e-05	0.00226716	1.66357e-07	0	6.80044e-07	0.00130204	0.00445947	-0.000449937	-4.35212e-05	-0.000993859	-0.00147859	-0.00123812
age	4.68214e-07	-8.895e-08	4.76856e-08	-1.46476e-07	1.66357e-07	6.53704e-09	0	1.5879e-08	-1.60534e-07	-5.33206e-07	4.63112e-08	1.17651e-07	-1.95854e-08	-5.93751e-08	-7.20031e-08
0b.female	0	0	0	0	0	0	0	0	0	0	0	0	0	0	0
1.female	1.0276e-07	-3.23329e-07	-9.40059e-07	-4.27415e-07	6.80044e-07	1.5879e-08	0	2.6856e-06	-1.71064e-07	1.53832e-06	-6.23129e-08	-7.77133e-07	4.12936e-07	3.01576e-07	-1.94158e-06
Pain/100_squared	-0.0615512	1.42685e-06	0.000569316	-0.000192914	0.00130204	-1.60534e-07	0	-1.71064e-07	0.0175729	0.0592587	-5.3162e-05	0.000132778	-0.000929286	-0.000464754	-0.0156276
Pain/100_square root	-0.223237	5.38116e-05	-0.00672396	5.59463e-05	0.00445947	-5.33206e-07	0	1.53832e-06	0.0592587	0.226867	0.00497274	-0.000432021	-0.00301581	-0.00177073	-0.0604201
ADL/100_squared	-0.0028167	-7.41719e-06	-0.00455225	-9.41327e-05	-0.000449937	4.63112e-08	0	-6.23129e-08	-5.3162e-05	0.00497274	0.00288534	0.000152744	0.000140289	0.000314013	-0.000501994
QoL/100_square root	4.31254e-05	4.02698e-06	-0.000270442	-0.00067139	-4.35212e-05	1.17651e-07	0	-7.77133e-07	0.000132778	-0.000432021	0.000152744	0.000930892	8.98814e-05	-7.1642e-05	0.000112019
Sport/100_squared	0.0031767	-1.24097e-05	-0.000219017	-7.7531e-05	-0.000993859	-1.95854e-08	0	4.12936e-07	-0.000929286	-0.00301581	0.000140289	8.98814e-05	0.000492812	0.00058703	0.000773685
Sport/100_square root	0.00174045	-8.62027e-06	-0.000507326	4.16676e-05	-0.00147859	-5.93751e-08	0	3.01576e-07	-0.000464754	-0.00177073	0.000314013	-7.1642e-05	0.00058703	0.0010822	0.000553636
_cons	0.059201	-2.88689e-05	0.000505347	-1.05728e-05	-0.00123812	-7.20031e-08	0	-1.94158e-06	-0.0156276	-0.0604201	-0.000501994	0.000112019	0.000773685	0.000553636	0.0166695
