# Supplementary material for: Mapping EQ-5D-3L from the Knee Injury and Osteoarthritis Outcome Score (KOOS)
Source: Qual Life Res. 2019 Sep 20;29(1):265–74. doi: 10.1007/s11136-019-02303-9 (PMC6962127; doi:10.1007/s11136-019-02303-9)
Supplement: Supplementary file 10 — Supplementary material 10 (XLS 57 kb) [file 11136_2019_2303_MOESM10_ESM.xls]

## Sheet: Table of results
Table 10. Preferred beta-mixture model with KOOS included in form of KOOS4.
Individual components			b	se	z	pvalue	ll	ul
	Component 1
		KOOS4	0.019014	0.000904937	21.0114	5.16433e-98	0.0172403	0.0207876
		age	0.00355946	0.000273858	12.9975	1.26489e-38	0.00302271	0.00409621
		0b.female	0
		1.female	0.0223338	0.00551366	4.05064	5.10782e-05	0.0115273	0.0331404
		KOOS4_squared	-1.65427e-05	7.75326e-06	-2.13364	0.032872	-3.17388e-05	-1.34658e-06
		_cons	1.11092	0.0269457	41.2282	0	1.05811	1.16374
	Component 1_lnphi*
		_cons	4.31212	0.0100269	430.056	0	4.29247	4.33178
	Component 2
		KOOS4	0.0291963	0.00164655	17.7318	2.38255e-70	0.0259692	0.0324235
		age	0.00325461	0.000709561	4.58679	4.50118e-06	0.00186389	0.00464532
		0b.female	0
		1.female	-0.0338488	0.012961	-2.61158	0.00901257	-0.059252	-0.00844559
		KOOS4_squared	-0.00017619	1.75486e-05	-10.0401	1.01544e-23	-0.000210585	-0.000141796
		_cons	-0.762963	0.0442469	-17.2433	1.25654e-66	-0.849685	-0.676241
	Component 2_lnphi*
		_cons	3.47398	0.0326264	106.478	0	3.41003	3.53793
	Component 3
		KOOS4	0.117075	0.0153843	7.61002	2.74063e-14	0.0869222	0.147228
		age	0.00637752	0.00557658	1.14363	0.252779	-0.00455238	0.0173074
		0b.female	0
		1.female	0.0989083	0.0713396	1.38644	0.165611	-0.0409146	0.238731
		KOOS4_squared	-0.000738201	0.000125024	-5.90449	3.53749e-09	-0.000983243	-0.000493159
		_cons	-2.34058	0.390589	-5.99243	2.06731e-09	-3.10612	-1.57504
	Component 3_lnphi*
		_cons	0.29335	0.171316	1.71233	0.0868359	-0.0424238	0.629124
Probability of component membership
	Probability Component 1
		KOOS4	0.0980162	0.0282995	3.46353	0.000533142	0.0425501	0.153482
		age	0.0131821	0.00769016	1.71415	0.0865016	-0.00189037	0.0282545
		0b.female	0
		1.female	0.767913	0.140742	5.45619	4.86457e-08	0.492065	1.04376
		KOOS4_squared	-0.000835015	0.000222494	-3.75297	0.000174749	-0.0012711	-0.000398934
		_cons	0.625061	0.933062	0.669903	0.50292	-1.20371	2.45383
	Probability Component 2
		KOOS4	-0.0430931	0.0297227	-1.44984	0.147104	-0.101349	0.0151624
		age	-0.0074379	0.00818644	-0.908563	0.363581	-0.023483	0.00860723
		0b.female	0
		1.female	0.45045	0.14869	3.02946	0.00244991	0.159023	0.741877
		KOOS4_squared	-0.00017137	0.000241611	-0.709283	0.478149	-0.000644919	0.000302178
		_cons	4.62068	0.953496	4.84604	1.25949e-06	2.75186	6.4895
Probability of full health
	Probability full health
		KOOS4	-0.0364594	0.00800665	-4.55363	5.2727e-06	-0.0521521	-0.0207666
		age	0.00963002	0.00175892	5.47495	4.37626e-08	0.00618259	0.0130774
		0b.female	0
		1.female	-0.0650074	0.0352699	-1.84314	0.0653089	-0.134135	0.00412045
		KOOS4_squared	0.00118103	5.61668e-05	21.0271	3.70242e-98	0.00107094	0.00129111
		_cons	-5.36959	0.291831	-18.3997	1.32199e-75	-5.94156	-4.79761
		C1_phi*	74.5988	0.747994			73.1471	76.0794
		C2_phi*	32.2649	1.05269			30.2662	34.3955
		C3_phi*	1.34091	0.22972			0.958463	1.87597
Bayesian information criteria	-70026.2
Mean error	-7.92e-05
Mean absolute error	0.1028
Root mean squared error	0.1537
*phi referes to precision parameter

## Sheet: Covariance matrix
		C1_mu	C1_mu	C1_mu	C1_mu	C1_mu	C1_mu	C1_lnphi	C2_mu	C2_mu	C2_mu	C2_mu	C2_mu	C2_mu	C2_lnphi	C3_mu	C3_mu	C3_mu	C3_mu	C3_mu	C3_mu	C3_lnphi	Prob_C1	Prob_C1	Prob_C1	Prob_C1	Prob_C1	Prob_C1	Prob_C2	Prob_C2	Prob_C2	Prob_C2	Prob_C2	Prob_C2	PM_ub	PM_ub	PM_ub	PM_ub	PM_ub	PM_ub
		KOOS4	age	0b.female	1.female	KOOS4_squared	_cons	_cons	KOOS4	age	0b.female	1.female	KOOS4_squared	_cons	_cons	KOOS4	age	0b.female	1.female	KOOS4_squared	_cons	_cons	KOOS4	age	0b.female	1.female	KOOS4_squared	_cons	KOOS4	age	0b.female	1.female	KOOS4_squared	_cons	KOOS4	age	0b.female	1.female	KOOS4_squared	_cons
C1_mu	KOOS4	8.18912e-07	1.04411e-08	0	2.99851e-08	-6.91451e-09	-2.23997e-05	1.03487e-06	3.19362e-08	-1.07139e-08	0	5.74846e-08	-3.49406e-10	-2.6483e-07	5.0784e-07	-8.49301e-07	5.18201e-08	0	-1.16183e-06	6.58221e-09	2.74076e-05	3.37141e-06	2.92554e-06	8.22778e-08	0	9.90887e-08	-2.21967e-08	-9.29484e-05	2.65532e-06	3.18433e-08	0	-3.63776e-07	-1.99573e-08	-8.39924e-05	-1.27167e-07	-6.25469e-08	0	-1.79049e-07	8.97194e-10	6.34888e-06
C1_mu	age	1.04411e-08	7.49984e-08	0	1.28549e-07	-8.20151e-11	-2.60682e-06	5.00226e-07	-2.63897e-09	5.60762e-09	0	-6.34187e-09	2.20447e-11	-7.87613e-08	1.81889e-07	-3.87445e-08	8.12311e-08	0	4.75582e-07	8.10374e-10	-1.61281e-06	2.87167e-06	2.10382e-07	1.60161e-07	0	1.27397e-06	-1.0296e-09	-1.54441e-05	1.63485e-07	1.45512e-07	0	1.21571e-06	-5.65058e-10	-1.39563e-05	2.22769e-09	2.80488e-08	0	1.34119e-07	6.11154e-11	-1.34693e-06
C1_mu	0b.female	0	0	0	0	0	0	0	0	0	0	0	0	0	0	0	0	0	0	0	0	0	0	0	0	0	0	0	0	0	0	0	0	0	0	0	0	0	0	0
C1_mu	1.female	2.99851e-08	1.28549e-07	0	3.04004e-05	-8.70804e-12	-1.98588e-05	2.34837e-06	6.9716e-08	-7.58801e-09	0	3.04349e-06	-5.36201e-10	-3.03432e-06	3.56385e-06	-1.40147e-06	1.11917e-06	0	1.19844e-05	1.68982e-08	-2.80835e-06	2.72284e-05	9.56629e-07	1.8076e-06	0	5.06704e-05	8.69334e-10	-0.00014721	2.67296e-07	1.74328e-06	0	4.49105e-05	7.65792e-09	-0.000128447	4.1037e-07	1.13089e-07	0	1.01933e-05	-2.82569e-09	-2.15024e-05
C1_mu	KOOS4_squared	-6.91451e-09	-8.20151e-11	0	-8.70804e-12	6.0113e-11	1.82067e-07	-6.88746e-09	-3.05762e-10	7.21736e-11	0	-3.82813e-10	3.38183e-12	3.314e-09	-2.58914e-09	6.86037e-09	-1.85992e-10	0	9.21945e-09	-5.07195e-11	-2.26798e-07	-1.0766e-08	-2.19937e-08	-4.99514e-10	0	1.44049e-09	1.70904e-10	6.70801e-07	-2.00389e-08	-7.88848e-11	0	5.75071e-09	1.55534e-10	6.01945e-07	1.31408e-09	6.5961e-10	0	2.65848e-09	-9.10299e-12	-6.67372e-08
C1_mu	_cons	-2.23997e-05	-2.60682e-06	0	-1.98588e-05	1.82067e-07	0.000726071	-4.74351e-05	-6.58227e-07	2.23849e-07	0	-3.40056e-06	7.33037e-09	6.0399e-06	-3.18286e-05	2.65062e-05	-5.83904e-06	0	1.17312e-05	-2.3707e-07	-0.000708616	-0.000282848	-9.87153e-05	-9.4011e-06	0	-7.7887e-05	7.07271e-07	0.00361861	-8.82651e-05	-7.58813e-06	0	-6.49342e-05	6.14186e-07	0.00329503	2.40349e-06	3.86519e-07	0	-7.0636e-06	-2.03213e-08	-7.47634e-05
C1_lnphi	_cons	1.03487e-06	5.00226e-07	0	2.34837e-06	-6.88746e-09	-4.74351e-05	0.000100538	-2.43422e-09	1.07297e-08	0	-2.62779e-06	-3.93166e-10	4.75337e-06	7.06116e-06	-1.4651e-06	6.3968e-06	0	2.53285e-05	5.94725e-08	-0.00014879	0.000282285	2.08232e-05	9.58922e-06	0	9.78002e-05	-9.2457e-08	-0.00135889	2.05526e-05	9.78482e-06	0	9.29533e-05	-8.72716e-08	-0.00135943	-2.14388e-06	-9.24966e-07	0	4.082e-07	1.27017e-08	0.000105755
C2_mu	KOOS4	3.19362e-08	-2.63897e-09	0	6.9716e-08	-3.05762e-10	-6.58227e-07	-2.43422e-09	2.71113e-06	1.19436e-07	0	1.69186e-06	-2.80647e-08	-6.07363e-05	-1.78541e-06	-3.54372e-07	-1.13415e-07	0	1.51729e-06	9.39446e-10	1.21491e-05	-1.0802e-05	-1.77894e-06	-1.47912e-07	0	5.10865e-08	1.08049e-08	7.11367e-05	-1.1755e-06	-5.91908e-08	0	8.88415e-07	3.11461e-09	5.90209e-05	-2.30472e-07	-9.77121e-09	0	-2.68084e-07	1.83893e-09	7.11917e-06
C2_mu	age	-1.07139e-08	5.60762e-09	0	-7.58801e-09	7.21736e-11	2.23849e-07	1.07297e-08	1.19436e-07	5.03477e-07	0	9.8467e-08	-8.03804e-10	-1.74618e-05	-6.19068e-07	1.12559e-07	-3.06816e-07	0	-1.34294e-06	-2.17555e-09	5.72889e-06	-6.67988e-06	-5.72544e-07	-4.28583e-07	0	-3.49822e-06	3.09665e-09	3.70273e-05	-4.89043e-07	-4.95439e-07	0	-3.90988e-06	1.76136e-09	3.83702e-05	3.33094e-08	3.15451e-08	0	2.30396e-07	-2.59291e-10	-1.93372e-06
C2_mu	0b.female	0	0	0	0	0	0	0	0	0	0	0	0	0	0	0	0	0	0	0	0	0	0	0	0	0	0	0	0	0	0	0	0	0	0	0	0	0	0	0
C2_mu	1.female	5.74846e-08	-6.34187e-09	0	3.04349e-06	-3.82813e-10	-3.40056e-06	-2.62779e-06	1.69186e-06	9.8467e-08	0	0.000167989	-1.16956e-08	-0.000130895	-1.63349e-05	3.34823e-06	-2.67524e-06	0	-2.7823e-05	-4.48685e-08	6.50295e-05	-1.91913e-05	-1.96682e-06	-3.1034e-06	0	-7.78805e-05	-7.02983e-09	0.000287766	-4.47482e-07	-3.45239e-06	0	-9.70189e-05	-2.82963e-08	0.000282936	-6.48187e-08	1.82771e-07	0	6.17733e-06	5.91357e-10	-5.09686e-06
C2_mu	KOOS4_squared	-3.49406e-10	2.20447e-11	0	-5.36201e-10	3.38183e-12	7.33037e-09	-3.93166e-10	-2.80647e-08	-8.03804e-10	0	-1.16956e-08	3.07954e-10	5.78906e-07	1.28171e-08	-8.11435e-10	4.38624e-10	0	-1.48753e-08	1.76753e-11	-2.03389e-08	1.00341e-08	3.88658e-09	-1.52459e-11	0	-1.93823e-08	-5.76037e-12	-2.06328e-07	-5.04694e-09	-1.48498e-09	0	-3.42141e-08	1.02048e-10	-4.42854e-09	3.07387e-09	1.89075e-10	0	4.79519e-09	-2.44758e-11	-9.71044e-08
C2_mu	_cons	-2.6483e-07	-7.87613e-08	0	-3.03432e-06	3.314e-09	6.0399e-06	4.75337e-06	-6.07363e-05	-1.74618e-05	0	-0.000130895	5.78906e-07	0.00195779	0.000123443	8.74257e-06	1.38064e-05	0	2.70437e-05	3.94808e-08	-0.000667801	0.000590673	8.67984e-05	1.9572e-05	0	0.000181945	-5.34475e-07	-0.00392371	7.60377e-05	2.06622e-05	0	0.000193836	-3.77251e-07	-0.00384934	2.71441e-06	-9.02951e-07	0	-5.89182e-06	-2.18661e-08	-5.20642e-05
C2_lnphi	_cons	5.0784e-07	1.81889e-07	0	3.56385e-06	-2.58914e-09	-3.18286e-05	7.06116e-06	-1.78541e-06	-6.19068e-07	0	-1.63349e-05	1.28171e-08	0.000123443	0.00106448	-1.10254e-05	6.66103e-06	0	2.38726e-05	2.31654e-07	-0.000173817	0.000633927	0.000190808	6.80363e-06	0	0.000228056	-1.26105e-06	-0.00739595	0.000203434	2.27054e-06	0	0.000365555	-1.35409e-06	-0.00772459	1.70829e-06	-2.78814e-08	0	3.66506e-06	-9.74522e-09	-7.7788e-05
C3_mu	KOOS4	-8.49301e-07	-3.87445e-08	0	-1.40147e-06	6.86037e-09	2.65062e-05	-1.4651e-06	-3.54372e-07	1.12559e-07	0	3.34823e-06	-8.11435e-10	8.74257e-06	-1.10254e-05	0.000236677	-2.78198e-05	0	-0.000159703	-1.87399e-06	-0.00504114	0.00119634	1.13837e-05	-2.10458e-05	0	-0.000395278	-1.39329e-07	0.000537597	1.39566e-05	-2.18217e-05	0	-0.000416055	-1.70016e-07	0.000526272	2.64876e-06	-1.24867e-07	0	2.50296e-07	-2.08663e-08	-7.23606e-05
C3_mu	age	5.18201e-08	8.12311e-08	0	1.11917e-06	-1.85992e-10	-5.83904e-06	6.3968e-06	-1.13415e-07	-3.06816e-07	0	-2.67524e-06	4.38624e-10	1.38064e-05	6.66103e-06	-2.78198e-05	3.10983e-05	0	0.000117015	3.04041e-07	-0.000295037	0.000216319	-7.52559e-06	2.16493e-05	0	0.000240253	1.55071e-07	-0.000956962	-1.213e-05	2.28558e-05	0	0.000252689	2.11082e-07	-0.000917502	-1.15789e-06	1.27691e-07	0	2.53377e-06	9.36346e-09	2.74507e-05
C3_mu	0b.female	0	0	0	0	0	0	0	0	0	0	0	0	0	0	0	0	0	0	0	0	0	0	0	0	0	0	0	0	0	0	0	0	0	0	0	0	0	0	0
C3_mu	1.female	-1.16183e-06	4.75582e-07	0	1.19844e-05	9.21945e-09	1.17312e-05	2.53285e-05	1.51729e-06	-1.34294e-06	0	-2.7823e-05	-1.48753e-08	2.70437e-05	2.38726e-05	-0.000159703	0.000117015	0	0.00508933	1.58048e-06	-0.00308824	-0.00101564	-0.000309252	0.000174829	0	0.00260991	2.72507e-06	0.00166131	-0.000330896	0.000184721	0	0.00275512	2.97445e-06	0.00169191	-8.68225e-08	2.34481e-06	0	1.6309e-05	1.47816e-09	-6.42183e-05
C3_mu	KOOS4_squared	6.58221e-09	8.10374e-10	0	1.68982e-08	-5.07195e-11	-2.3707e-07	5.94725e-08	9.39446e-10	-2.17555e-09	0	-4.48685e-08	1.76753e-11	3.94808e-08	2.31654e-07	-1.87399e-06	3.04041e-07	0	1.58048e-06	1.56309e-08	3.58653e-05	-6.64851e-06	-4.63736e-08	2.61788e-07	0	3.88791e-06	1.42462e-09	-1.21651e-05	-9.59225e-08	2.72445e-07	0	4.1165e-06	2.02493e-09	-1.17502e-05	-2.70824e-08	1.57802e-09	0	1.64183e-09	2.11153e-10	7.42645e-07
C3_mu	_cons	2.74076e-05	-1.61281e-06	0	-2.80835e-06	-2.26798e-07	-0.000708616	-0.00014879	1.21491e-05	5.72889e-06	0	6.50295e-05	-2.03389e-08	-0.000667801	-0.000173817	-0.00504114	-0.000295037	0	-0.00308824	3.58653e-05	0.15256	-0.0288099	0.0015757	-0.000267835	0	0.000940173	-1.4589e-05	-0.0250304	0.00174667	-0.00029468	0	0.000856735	-1.65322e-05	-0.0274016	-2.29411e-05	-2.71015e-06	0	-9.68509e-05	1.80649e-07	0.000758385
C3_lnphi	_cons	3.37141e-06	2.87167e-06	0	2.72284e-05	-1.0766e-08	-0.000282848	0.000282285	-1.0802e-05	-6.67988e-06	0	-1.91913e-05	1.00341e-08	0.000590673	0.000633927	0.00119634	0.000216319	0	-0.00101564	-6.64851e-06	-0.0288099	0.0293493	0.00215952	0.000272799	0	0.00114715	-1.41004e-05	-0.0885932	0.00212765	0.000281522	0	0.00121714	-1.35207e-05	-0.0886824	-6.99315e-06	-7.67858e-08	0	-4.45196e-06	4.90144e-08	0.000238282
Prob_C1	KOOS4	2.92554e-06	2.10382e-07	0	9.56629e-07	-2.19937e-08	-9.87153e-05	2.08232e-05	-1.77894e-06	-5.72544e-07	0	-1.96682e-06	3.88658e-09	8.67984e-05	0.000190808	1.13837e-05	-7.52559e-06	0	-0.000309252	-4.63736e-08	0.0015757	0.00215952	0.000800864	4.30753e-06	0	0.000126517	-6.21076e-06	-0.0244093	0.000819182	1.73371e-06	0	0.000122028	-6.40826e-06	-0.0246844	8.2575e-07	-3.08056e-07	0	-1.20963e-05	-6.85332e-09	-8.53472e-06
Prob_C1	age	8.22778e-08	1.60161e-07	0	1.8076e-06	-4.99514e-10	-9.4011e-06	9.58922e-06	-1.47912e-07	-4.28583e-07	0	-3.1034e-06	-1.52459e-11	1.9572e-05	6.80363e-06	-2.10458e-05	2.16493e-05	0	0.000174829	2.61788e-07	-0.000267835	0.000272799	4.30753e-06	5.91386e-05	0	0.000389098	5.98028e-08	-0.00243269	-6.87119e-07	6.05188e-05	0	0.000403538	1.20207e-07	-0.00238992	-1.65195e-06	-2.0348e-07	0	-7.05994e-07	1.26489e-08	5.52483e-05
Prob_C1	0b.female	0	0	0	0	0	0	0	0	0	0	0	0	0	0	0	0	0	0	0	0	0	0	0	0	0	0	0	0	0	0	0	0	0	0	0	0	0	0	0
Prob_C1	1.female	9.90887e-08	1.27397e-06	0	5.06704e-05	1.44049e-09	-7.7887e-05	9.78002e-05	5.10865e-08	-3.49822e-06	0	-7.78805e-05	-1.93823e-08	0.000181945	0.000228056	-0.000395278	0.000240253	0	0.00260991	3.88791e-06	0.000940173	0.00114715	0.000126517	0.000389098	0	0.0198082	3.30327e-07	-0.027403	7.85457e-05	0.000405737	0	0.0200068	9.07779e-07	-0.0271263	-1.31409e-05	-1.71886e-06	0	-6.48318e-05	1.02953e-07	0.000481792
Prob_C1	KOOS4_squared	-2.21967e-08	-1.0296e-09	0	8.69334e-10	1.70904e-10	7.07271e-07	-9.2457e-08	1.08049e-08	3.09665e-09	0	-7.02983e-09	-5.76037e-12	-5.34475e-07	-1.26105e-06	-1.39329e-07	1.55071e-07	0	2.72507e-06	1.42462e-09	-1.4589e-05	-1.41004e-05	-6.21076e-06	5.98028e-08	0	3.30327e-07	4.95037e-08	0.000179524	-6.3905e-06	8.38239e-08	0	4.28793e-07	5.1494e-08	0.00018217	-1.1424e-08	2.8327e-09	0	1.19817e-07	8.89309e-11	2.06517e-07
Prob_C1	_cons	-9.29484e-05	-1.54441e-05	0	-0.00014721	6.70801e-07	0.00361861	-0.00135889	7.11367e-05	3.70273e-05	0	0.000287766	-2.06328e-07	-0.00392371	-0.00739595	0.000537597	-0.000956962	0	0.00166131	-1.21651e-05	-0.0250304	-0.0885932	-0.0244093	-0.00243269	0	-0.027403	0.000179524	0.870604	-0.024636	-0.00241704	0	-0.0281122	0.000181515	0.875385	5.101e-05	1.34403e-05	0	0.000306871	-3.64529e-07	-0.00217158
Prob_C2	KOOS4	2.65532e-06	1.63485e-07	0	2.67296e-07	-2.00389e-08	-8.82651e-05	2.05526e-05	-1.1755e-06	-4.89043e-07	0	-4.47482e-07	-5.04694e-09	7.60377e-05	0.000203434	1.39566e-05	-1.213e-05	0	-0.000330896	-9.59225e-08	0.00174667	0.00212765	0.000819182	-6.87119e-07	0	7.85457e-05	-6.3905e-06	-0.024636	0.00088344	-3.2217e-06	0	7.56891e-05	-7.05289e-06	-0.0259134	-1.13872e-06	-8.29025e-08	0	-9.38025e-06	8.28267e-09	4.24599e-05
Prob_C2	age	3.18433e-08	1.45512e-07	0	1.74328e-06	-7.88848e-11	-7.58813e-06	9.78482e-06	-5.91908e-08	-4.95439e-07	0	-3.45239e-06	-1.48498e-09	2.06622e-05	2.27054e-06	-2.18217e-05	2.28558e-05	0	0.000184721	2.72445e-07	-0.00029468	0.000281522	1.73371e-06	6.05188e-05	0	0.000405737	8.38239e-08	-0.00241704	-3.2217e-06	6.70178e-05	0	0.000429689	1.49196e-07	-0.00253969	-1.55033e-06	-2.11566e-07	0	-9.74341e-07	1.17983e-08	5.30741e-05
Prob_C2	0b.female	0	0	0	0	0	0	0	0	0	0	0	0	0	0	0	0	0	0	0	0	0	0	0	0	0	0	0	0	0	0	0	0	0	0	0	0	0	0	0
Prob_C2	1.female	-3.63776e-07	1.21571e-06	0	4.49105e-05	5.75071e-09	-6.49342e-05	9.29533e-05	8.88415e-07	-3.90988e-06	0	-9.70189e-05	-3.42141e-08	0.000193836	0.000365555	-0.000416055	0.000252689	0	0.00275512	4.1165e-06	0.000856735	0.00121714	0.000122028	0.000403538	0	0.0200068	4.28793e-07	-0.0281122	7.56891e-05	0.000429689	0	0.0221087	1.03901e-06	-0.0290888	-1.08379e-05	-1.92624e-06	0	-9.15068e-05	8.53358e-08	0.000424275
Prob_C2	KOOS4_squared	-1.99573e-08	-5.65058e-10	0	7.65792e-09	1.55534e-10	6.14186e-07	-8.72716e-08	3.11461e-09	1.76136e-09	0	-2.82963e-08	1.02048e-10	-3.77251e-07	-1.35409e-06	-1.70016e-07	2.11082e-07	0	2.97445e-06	2.02493e-09	-1.65322e-05	-1.35207e-05	-6.40826e-06	1.20207e-07	0	9.07779e-07	5.1494e-08	0.000181515	-7.05289e-06	1.49196e-07	0	1.03901e-06	5.83758e-08	0.000193704	1.15489e-08	2.29862e-10	0	8.68139e-08	-8.86474e-11	-3.87491e-07
Prob_C2	_cons	-8.39924e-05	-1.39563e-05	0	-0.000128447	6.01945e-07	0.00329503	-0.00135943	5.90209e-05	3.83702e-05	0	0.000282936	-4.42854e-09	-0.00384934	-0.00772459	0.000526272	-0.000917502	0	0.00169191	-1.17502e-05	-0.0274016	-0.0886824	-0.0246844	-0.00238992	0	-0.0271263	0.00018217	0.875385	-0.0259134	-0.00253969	0	-0.0290888	0.000193704	0.909155	8.44132e-05	9.6535e-06	0	0.000273736	-6.18143e-07	-0.00307309
PM_ub	KOOS4	-1.27167e-07	2.22769e-09	0	4.1037e-07	1.31408e-09	2.40349e-06	-2.14388e-06	-2.30472e-07	3.33094e-08	0	-6.48187e-08	3.07387e-09	2.71441e-06	1.70829e-06	2.64876e-06	-1.15789e-06	0	-8.68225e-08	-2.70824e-08	-2.29411e-05	-6.99315e-06	8.2575e-07	-1.65195e-06	0	-1.31409e-05	-1.1424e-08	5.101e-05	-1.13872e-06	-1.55033e-06	0	-1.08379e-05	1.15489e-08	8.44132e-05	6.41065e-05	4.68438e-07	0	3.20582e-07	-4.43424e-07	-0.00223913
PM_ub	age	-6.25469e-08	2.80488e-08	0	1.13089e-07	6.5961e-10	3.86519e-07	-9.24966e-07	-9.77121e-09	3.15451e-08	0	1.82771e-07	1.89075e-10	-9.02951e-07	-2.78814e-08	-1.24867e-07	1.27691e-07	0	2.34481e-06	1.57802e-09	-2.71015e-06	-7.67858e-08	-3.08056e-07	-2.0348e-07	0	-1.71886e-06	2.8327e-09	1.34403e-05	-8.29025e-08	-2.11566e-07	0	-1.92624e-06	2.29862e-10	9.6535e-06	4.68438e-07	3.09381e-06	0	6.03514e-06	-3.10402e-09	-0.000109958
PM_ub	0b.female	0	0	0	0	0	0	0	0	0	0	0	0	0	0	0	0	0	0	0	0	0	0	0	0	0	0	0	0	0	0	0	0	0	0	0	0	0	0	0
PM_ub	1.female	-1.79049e-07	1.34119e-07	0	1.01933e-05	2.65848e-09	-7.0636e-06	4.082e-07	-2.68084e-07	2.30396e-07	0	6.17733e-06	4.79519e-09	-5.89182e-06	3.66506e-06	2.50296e-07	2.53377e-06	0	1.6309e-05	1.64183e-09	-9.68509e-05	-4.45196e-06	-1.20963e-05	-7.05994e-07	0	-6.48318e-05	1.19817e-07	0.000306871	-9.38025e-06	-9.74341e-07	0	-9.15068e-05	8.68139e-08	0.000273736	3.20582e-07	6.03514e-06	0	0.00124397	5.66875e-09	-0.000762374
PM_ub	KOOS4_squared	8.97194e-10	6.11154e-11	0	-2.82569e-09	-9.10299e-12	-2.03213e-08	1.27017e-08	1.83893e-09	-2.59291e-10	0	5.91357e-10	-2.44758e-11	-2.18661e-08	-9.74522e-09	-2.08663e-08	9.36346e-09	0	1.47816e-09	2.11153e-10	1.80649e-07	4.90144e-08	-6.85332e-09	1.26489e-08	0	1.02953e-07	8.89309e-11	-3.64529e-07	8.28267e-09	1.17983e-08	0	8.53358e-08	-8.86474e-11	-6.18143e-07	-4.43424e-07	-3.10402e-09	0	5.66875e-09	3.15471e-09	1.49221e-05
PM_ub	_cons	6.34888e-06	-1.34693e-06	0	-2.15024e-05	-6.67372e-08	-7.47634e-05	0.000105755	7.11917e-06	-1.93372e-06	0	-5.09686e-06	-9.71044e-08	-5.20642e-05	-7.7788e-05	-7.23606e-05	2.74507e-05	0	-6.42183e-05	7.42645e-07	0.000758385	0.000238282	-8.53472e-06	5.52483e-05	0	0.000481792	2.06517e-07	-0.00217158	4.24599e-05	5.30741e-05	0	0.000424275	-3.87491e-07	-0.00307309	-0.00223913	-0.000109958	0	-0.000762374	1.49221e-05	0.0851652
